# Supplementary material for: Mixed-Culture Metagenomics of the Microbes Making Sour Beer
Source: MDPI journal article supplement (doi:10.3390/fermentation7030174), 2021-08-30
Supplement: s1 [file s1]

**Supplementary Table S1:** Commercial cultures used to inoculate non-spontaneous mixed-fermentation beers and matches found in the next-generation sequencing data.

| Sample | Commercial culture inoculated*                                                                                                                                                                                                                                                                                                                                                                                                                                                                                                                                                                                                                                                                          | Identification match                                                                                                                                                                                                                                                                                                                                                                                                                                                                                                                                                                                                                                                                                                                             |
|--------|---------------------------------------------------------------------------------------------------------------------------------------------------------------------------------------------------------------------------------------------------------------------------------------------------------------------------------------------------------------------------------------------------------------------------------------------------------------------------------------------------------------------------------------------------------------------------------------------------------------------------------------------------------------------------------------------------------|--------------------------------------------------------------------------------------------------------------------------------------------------------------------------------------------------------------------------------------------------------------------------------------------------------------------------------------------------------------------------------------------------------------------------------------------------------------------------------------------------------------------------------------------------------------------------------------------------------------------------------------------------------------------------------------------------------------------------------------------------|
| #2     | New World Saison Blend Escarpment Labs ( <i>Saccharomyces</i> spp. + <i>Brettanomyces</i> spp.)<br>Brett M Escarpment Labs ( <i>Brettanomyces bruxellensis</i> )                                                                                                                                                                                                                                                                                                                                                                                                                                                                                                                                        | <i>Saccharomyces cerevisiae</i> was identified in 61.4% of ASVs from fungi<br><i>Brettanomyces bruxellensis</i> was identified in 30.3% of ASVs from fungi                                                                                                                                                                                                                                                                                                                                                                                                                                                                                                                                                                                       |
| #11    | Sour Solera Bootleg ( <i>Saccharomyces</i> spp. + <i>Brettanomyces</i> spp. + <i>Lactobacillus</i> spp. + <i>Pediococcus</i> spp. + other wild microorganisms)<br>Mélange Yeast Bay ( <i>Saccharomyces cerevisiae</i> var. <i>diastaticus</i> + <i>Saccharomyces fermentati</i> + <i>Brettanomyces</i> spp. + <i>Lactobacillus brevis</i> + <i>Lactobacillus delbrueckii</i> + <i>Pediococcus damnosus</i> )<br>Bugcounty East Coast Yeast ( <i>Saccharomyces</i> spp. + <i>Brettanomyces lambicus</i> + <i>Brettanomyces anomalus</i> + <i>Brettanomyces claussenii</i> + <i>Brettanomyces custersianus</i> + <i>Brettanomyces naardenensis</i> + <i>Lactobacillus</i> spp. + <i>Pediococcus</i> spp.) | <i>Saccharomyces cerevisiae</i> was identified in 77.9% of ASVs from fungi<br><i>Brettanomyces bruxellensis</i> in 13.6% of ASVs from fungi<br><i>Brettanomyces anomalus</i> in 6.7% of ASVs from fungi<br><i>Brettanomyces naardenensis</i> in 0.8% of ASVs from fungi<br><i>Brettanomyces custersianus</i> in 0.3% of ASVs from fungi<br><i>Lactobacillus casei-paracasei</i> in 74.0% of ASVs from bacteria<br><i>Pediococcus damnosus</i> in 13.8% of ASVs from bacteria<br><i>Lactobacillus brevis</i> in 9.9% of ASVs from bacteria<br><i>Lactobacillus acetotolerans</i> in 0.5% of ASVs from bacteria<br><i>Lactobacillus plantarum</i> in 0.2% of ASVs from bacteria<br><i>Lactobacillus delbrueckii</i> in 0.06% of ASVs from bacteria |
| #18    | Roeselare blend Wyeast ( <i>Brettanomyces</i> spp. + <i>Saccharomyces cerevisiae</i> + <i>Lactobacillus</i> spp. + <i>Pediococcus</i> spp.)<br>French Saison Wyeast ( <i>Saccharomyces cerevisiae</i> var. <i>diastaticus</i> )<br>WLP650 White Labs ( <i>Brettanomyces bruxellensis</i> )                                                                                                                                                                                                                                                                                                                                                                                                              | <i>Brettanomyces bruxellensis</i> was identified in 99.5% of ASVs from fungi<br><i>Saccharomyces cerevisiae</i> was identified in 0.09% of ASVs from fungi<br><i>Lactobacillus acetotolerans</i> was identified in 100% of ASVs from bacteria                                                                                                                                                                                                                                                                                                                                                                                                                                                                                                    |
| #19    | Belgian Saison I White Labs ( <i>Saccharomyces cerevisiae</i> )                                                                                                                                                                                                                                                                                                                                                                                                                                                                                                                                                                                                                                         | <i>Saccharomyces cerevisiae</i> was identified in 7.3% of ASVs from fungi                                                                                                                                                                                                                                                                                                                                                                                                                                                                                                                                                                                                                                                                        |

\*The composition of the commercial culture was obtained from company/laboratory website.
